# Supplementary material for: Electrochemical Investigation of Iron-Catalyzed Atom Transfer Radical Polymerization
Source: MDPI journal article supplement (doi:10.3390/molecules27196312), 2022-09-24
Supplement: s1 [file s1]

Supporting Materials for

# Electrochemical investigation of iron-catalyzed atom transfer radical polymerization

Gianluca Gazzola <sup>1,†</sup>, Sebastiano Pasinato <sup>1,†</sup>, Marco Fantin <sup>1</sup>, Niccolò Braidì <sup>2</sup>, Cristina Tubaro <sup>1</sup>, Christian Durante <sup>1</sup> and Abdirisak Ahmed Isse <sup>1,\*</sup>

<sup>1</sup> Department of Chemical Sciences, University of Padova, Via Marzolo 1, 35131 Padova, Italy

<sup>2</sup> Department of Chemical and Geological Sciences, University of Modena and Reggio Emilia, Via Campi 103, 41125 Modena, Italy

\* Correspondence: abdirisak.ahmedisse@unipd.it

† These authors contributed equally to this work.

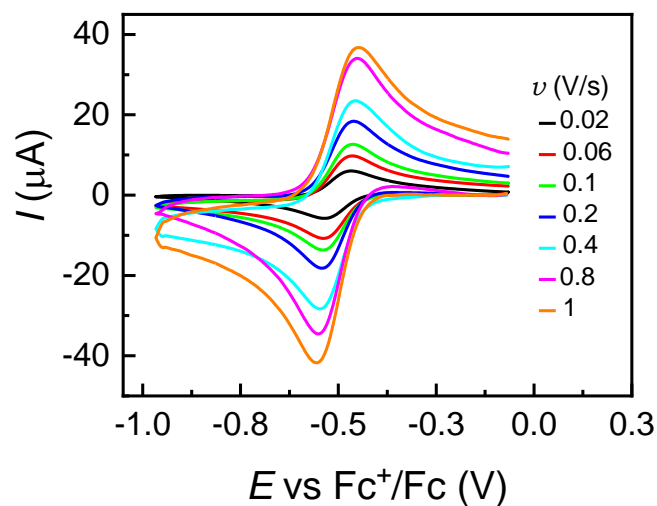

**Figure S1.** Cyclic voltammetry of 0.93 mM FeCl<sub>3</sub> in DMF + 0.1 M Et<sub>4</sub>NBF<sub>4</sub> + 20 mM Et<sub>4</sub>NCl, recorded on a GC electrode at different scan rates at  $T = 25$  °C.

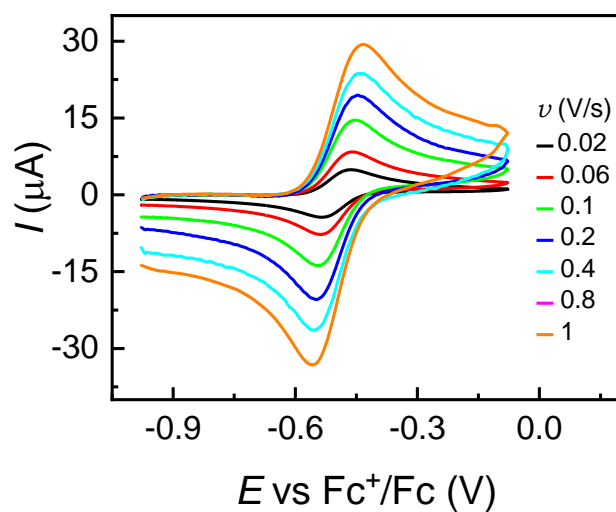

**Figure S2.** Cyclic voltammetry of 1.83 mM FeCl<sub>2</sub> in DMF + 0.1 M Et<sub>4</sub>NBF<sub>4</sub> + 20 mM Et<sub>4</sub>NCl, recorded on a GC electrode at different scan rates at  $T = 25$  °C.

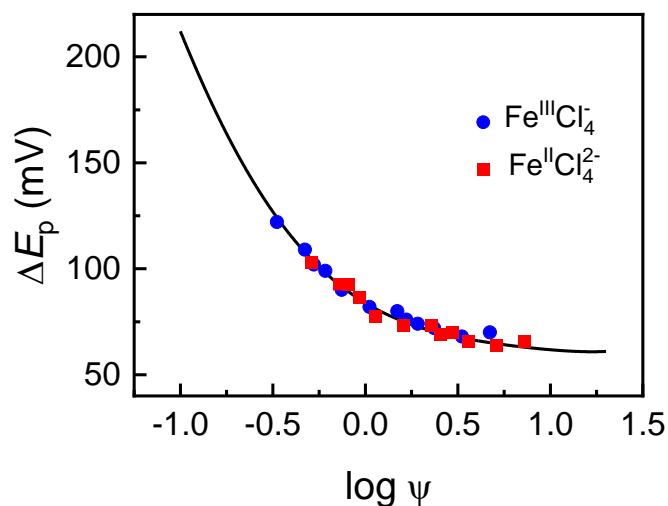

**Figure S3.** Fitting of experimental data obtained from cyclic voltammetry of  $\text{FeCl}_4^-$  and  $\text{FeCl}_4^{2-}$  on a theoretical working curve (solid line) for the determination of  $k^\circ$  in DMF + 0.1 M  $\text{Et}_4\text{NBF}_4$  at  $T = 25^\circ\text{C}$ . The dimensionless parameter  $\psi$  is defined as:

$$\psi = \frac{(D_{\text{Ox}}/D_{\text{Red}})^{\alpha/2} k^\circ}{((nF/RT)\pi D_{\text{Ox}} v)^{1/2}}$$

$\alpha$  was assumed to be 0.5, whereas  $D_{\text{ox}}$  and  $D_{\text{red}}$  were measured as  $(8.0 \pm 0.8) \times 10^{-6} \text{ cm}^2\text{s}^{-1}$  and  $(2.3 \pm 0.1) \times 10^{-6} \text{ cm}^2\text{s}^{-1}$ .

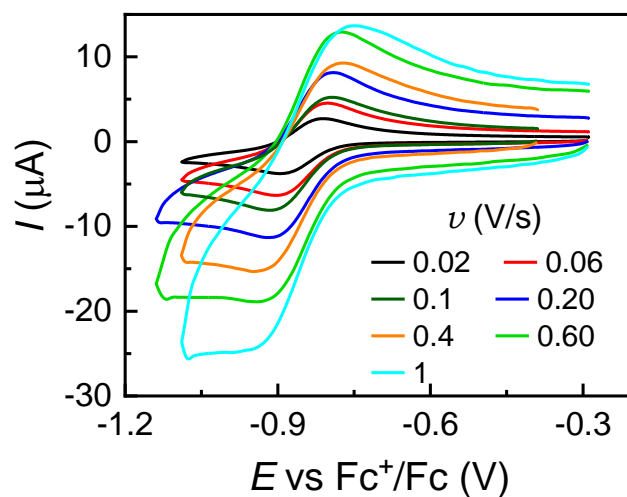

**Figure S4.** Cyclic voltammetry of 1.0 mM  $\text{Fe}^{\text{III}}\text{L}(\text{Cl})$  in DMF + 0.1 M  $\text{Et}_4\text{NBF}_4$  + 30 mM  $\text{Et}_4\text{NCl}$ , recorded on a GC electrode at different scan rates at  $T = 25^\circ\text{C}$ .

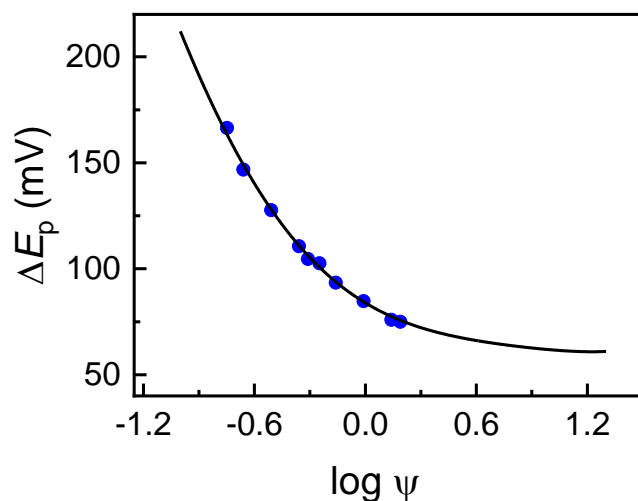

**Figure S5.** Fitting of experimental data obtained from cyclic voltammetry of  $\text{Fe}^{\text{III}}\text{L}(\text{Cl})$  on a theoretical working curve (solid line) for the determination of  $k^\circ$  in DMF + 0.1 M  $\text{Et}_4\text{NBF}_4$  at  $T = 25^\circ\text{C}$ .  $\alpha$  was assume to be 0.5, whereas the value of  $D$  measured for  $\text{Fe}^{\text{III}}\text{L}(\text{Cl})$  ( $(8.0 \pm 0.8) \times 10^{-6} \text{ cm}^2\text{s}^{-1}$ ) was used for both oxidation states of the complex.

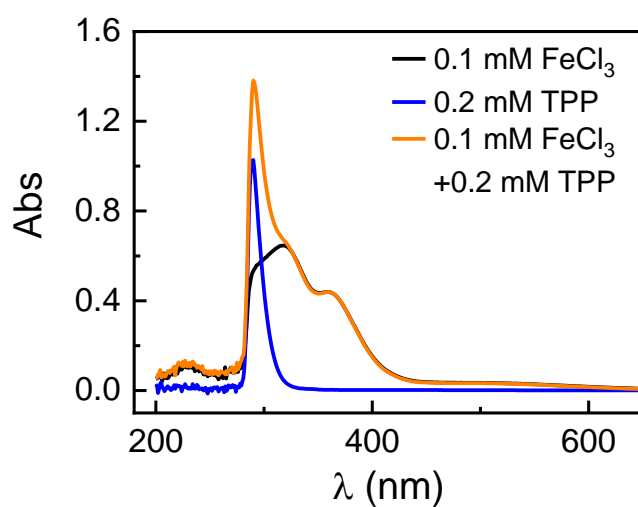

**Figure S6.** UV-vis spectra of 0.1 mM  $\text{FeCl}_3$ , 0.2 mM TPP and a mixture of 0.1 mM  $\text{FeCl}_3$  + 0.2 mM TPP, in DMF (path length = 1 cm).

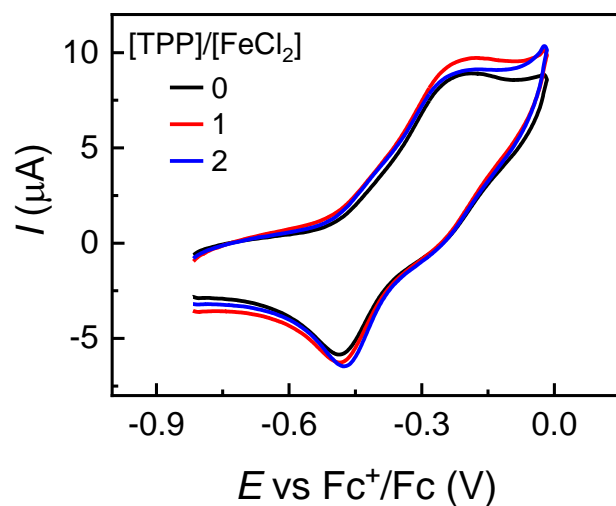

**Figure S7.** Cyclic voltammetry of 1.08 mM FeCl<sub>2</sub> in DMF + 0.1 M Et<sub>4</sub>NBF<sub>4</sub>, recorded on a GC electrode in the absence and presence of triphenylphosphine (TPP) at  $v = 0.2$  V/s and  $T = 25$  °C.

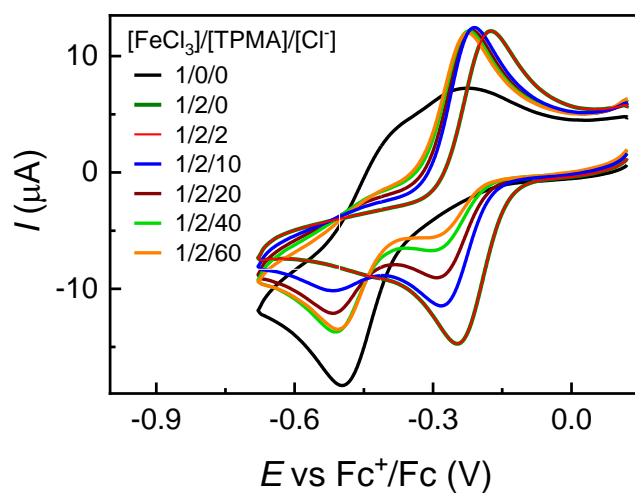

**Figure S8.** Cyclic voltammetry of 1.1 mM FeCl<sub>3</sub> in DMF + 0.1 M Et<sub>4</sub>NBF<sub>4</sub> recorded on a GC electrode at  $v = 0.2$  V/s and  $T = 25$  °C, before and after addition of TPMA and Et<sub>4</sub>NCl.

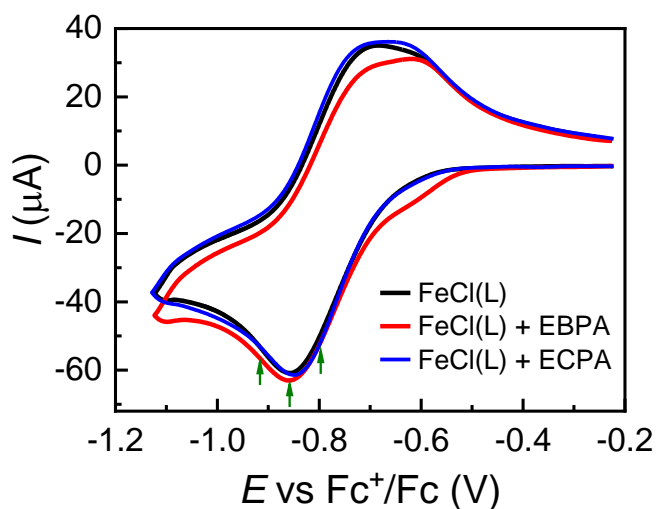

**Figure S9.** Cyclic voltammetry of 5 mM  $\text{Fe}^{\text{III}}\text{L}(\text{Cl})$  in DMF/MMA (50/50, v/v) + 0.1 M  $\text{Et}_4\text{NBF}_4$  recorded on a GC electrode at  $v = 0.2$  V/s and  $T = 50$  °C, in the absence (black line) and presence of 15 mM ECPA (blue line) or 15 mM EBPA (red line). The arrows indicate  $E_{\text{app}}$  values used during *e*ATRP:  $E_{\text{app}} = E_p + 0.06$  V,  $E_p$  and  $E_p - 0.06$  V.

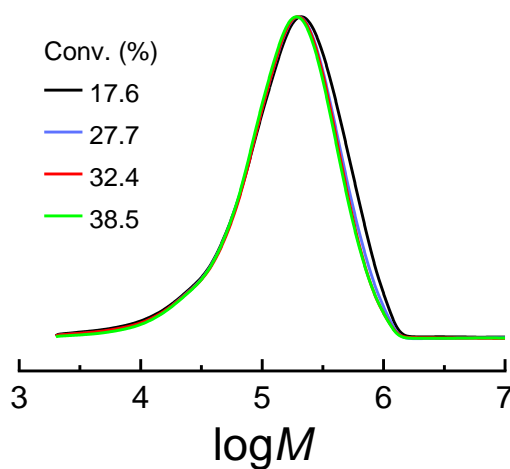

**Figure S10.** GPC traces of PMMA samples taken at different monomer conversions during *e*ATRP of MMA mediated by  $\text{Fe}^{\text{III}}\text{L}(\text{Cl})$  in DMF/MMA (50/50, v/v) + 0.1 M  $\text{Et}_4\text{NBF}_4$  with EBPA as initiator performed at 50 °C and  $E_{\text{app}} = E_p + 0.06$  V. Other conditions:  $[\text{MMA}]:[\text{RX}]:[\text{Fe}^{\text{III}}\text{L}(\text{Cl})] = 100:0.32:0.11$ , with  $[\text{Fe}^{\text{III}}\text{L}(\text{Cl})] = 5$  mM.

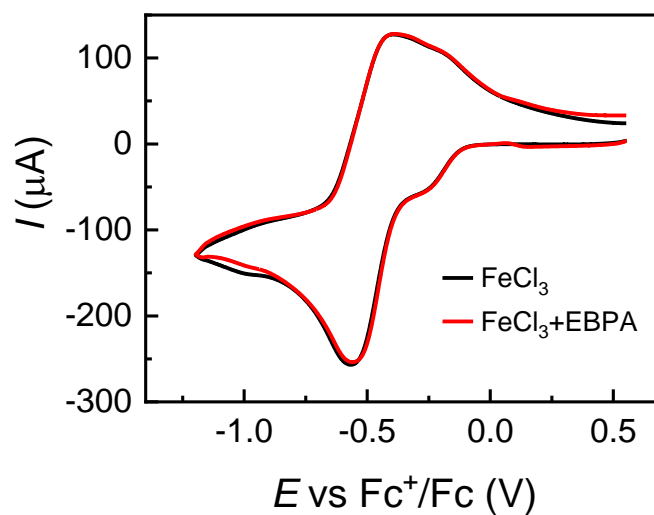

**Figure S11.** Cyclic voltammetry of 11.75 mM  $\text{Fe}^{\text{III}}\text{Cl}_3$  in DMF/MMA (50/50, v/v) + 0.1 M  $\text{Et}_4\text{NBF}_4$  recorded on a GC electrode at  $v = 0.2 \text{ V/s}$  and  $T = 55^\circ\text{C}$ , in the absence (black line) and presence of 47 mM EBPA (red line).

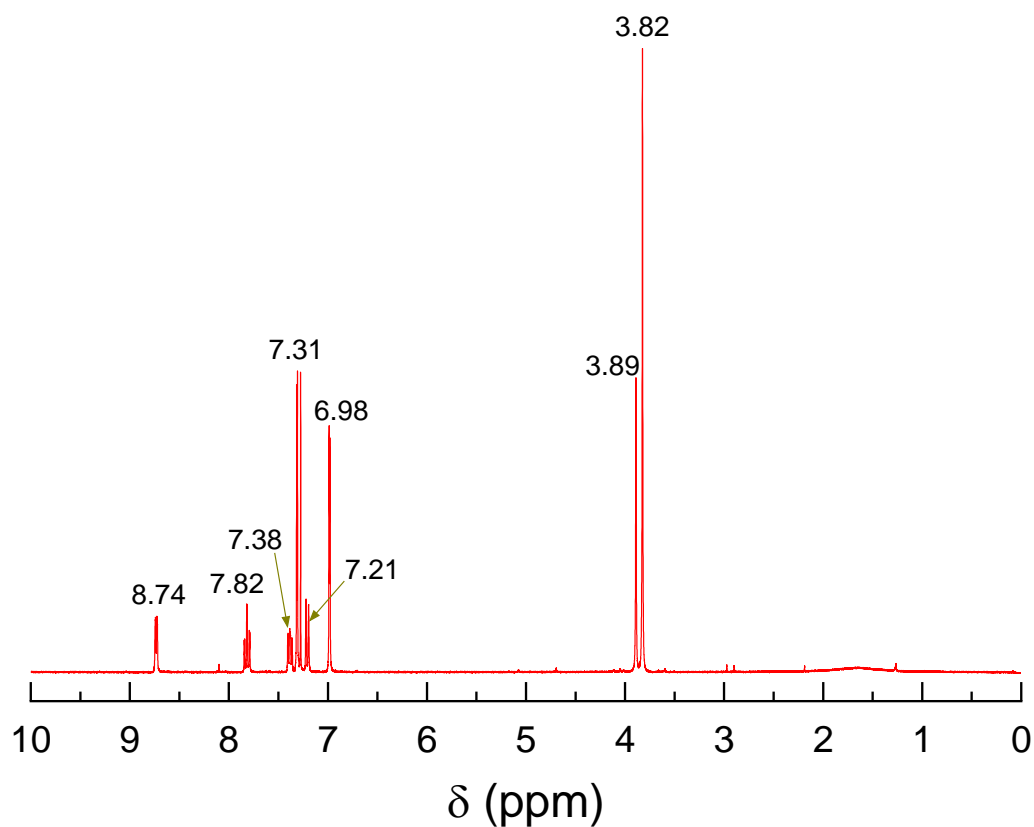

**Figure S12.**  $^1\text{H}$  NMR spectrum (300 MHz,  $\text{CDCl}_3$ ) of 2-pyridylamino-*N,N*-bis(2-methylene-4,6-dichlorophenol).

**Table S1.** <sup>1</sup>H NMR spectral data of 2-pyridylamino-*N,N*-bis(2-methylene-4,6-dichlorophenol).

| Chemical shift (ppm), multiplicity, number of protons |                         |
|-------------------------------------------------------|-------------------------|
| This work                                             | Literature <sup>1</sup> |
| 8.74, d, 1H                                           | 8.69, d, 1H             |
| 7.82, ddd, 1H                                         | 7.78, ddd, 1H           |
| 7.38, dd, 1H                                          | 7.34, dd, 1H            |
| 7.31, d, 2H                                           | 7.28, s, 2H             |
| 7.21, d, 1H                                           | 7.16, d, 1H             |
| 6.98, d, 2H                                           | 6.94, s, 2H             |
| 3.89, s, 2H                                           | 3.85, s, 2H             |
| 3.82, s, 4H                                           | 3.79, s, 4H             |

<sup>1</sup>Reference 1.**Table S2.** Elemental analysis of chloro(2-pyridylamino-*N,N*-bis(2-methylene-4,6-dichlorophenolate))iron(III).

| Element | Predicted (wt%) | Experimental (wt%) |
|---------|-----------------|--------------------|
| C       | 43.88           | 44.46              |
| H       | 2.58            | 2.89               |
| N       | 5.12            | 4.99               |

## References

- 1) Reckling, A.M.; Martin, D.; Dawe, L.N.; Decken, A.; Kozak, C.M. Structure and C–C Cross-Coupling Reactivity of Iron(III) Complexes of Halogenated Amine-Bis(Phenolate) Ligands. *J Organomet Chem* **2011**, 696, 787–794.
